# Supplementary material for: Social distancing compliance: A video observational analysis
Source: PubMed Central journal article supplement (PMC7959357; doi:10.1371/journal.pone.0248221), 2021-03-15
Supplement: pone.0248221.s002.pdf [file pone.0248221.s002.pdf]

## S2 Appendix:

### Coded violations and number of people on the street with unimputed data

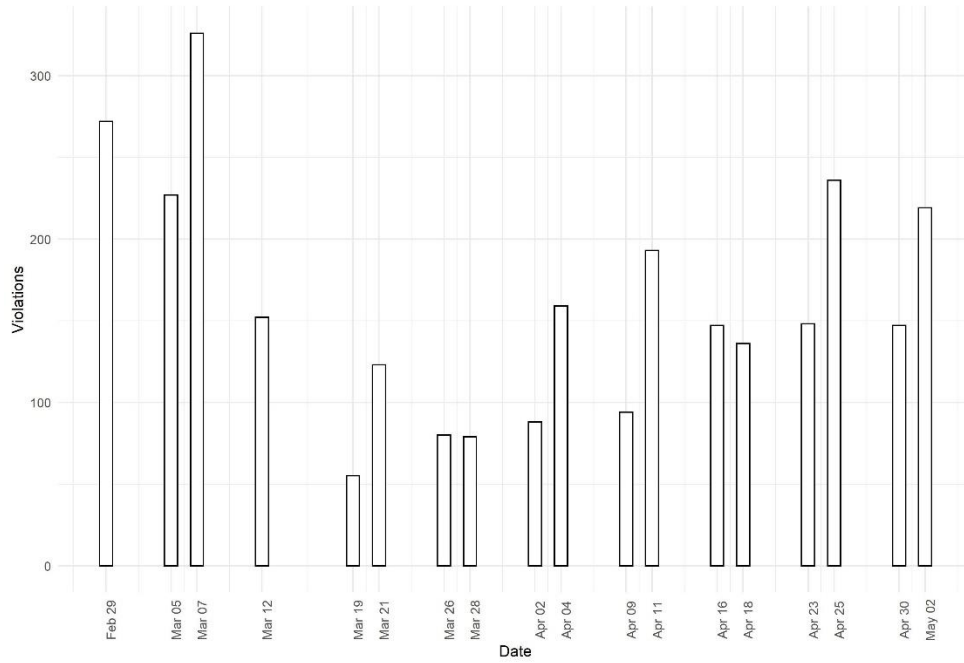

Fig S2.1. Observed social distancing violations (i.e., < 1.5 meter proximity by non-household members), unimputed data

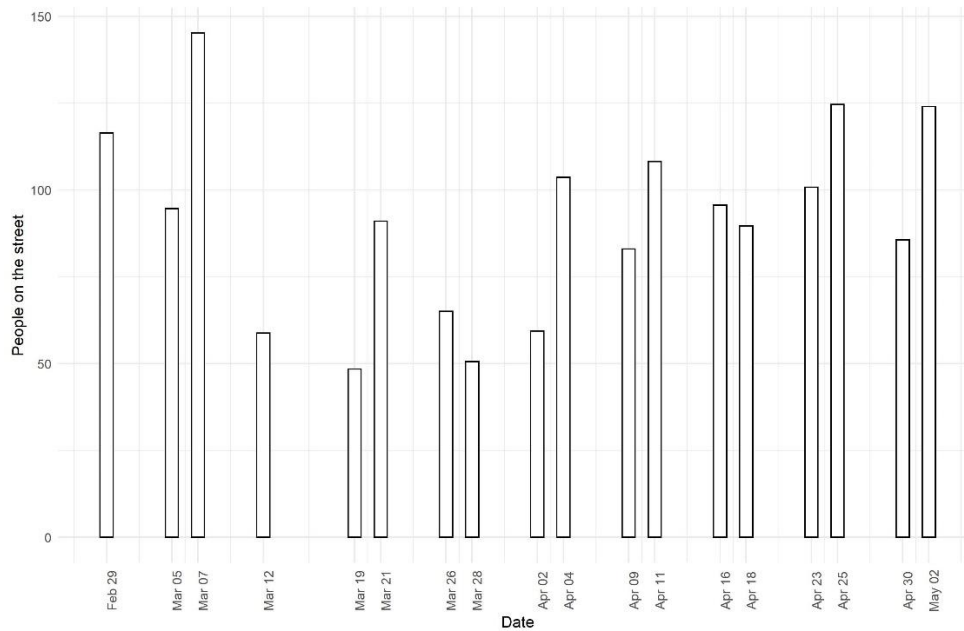

Fig S2.2. Number of people on the street, unimputed data
